# Supplementary material for: Effect of pRi T-DNA genes and elicitation on morphology and phytoecdysteroid biosynthesis in Ajuga bracteosa hairy roots
Source: Royal Society of Chemistry journal article supplement (doi:10.1039/c7ra06399g), 2017-01-01
Supplement: c7ra06399g1.pdf [file c7ra06399g1.pdf]

**ESI table 1. Media used for the optimization of hairy root induction, stabilization and steady growth in *A. bracteosa***

| <b>Medium</b>                                                   | <b>Composition</b>            |
|-----------------------------------------------------------------|-------------------------------|
| First phase media (hairy root induction $\geq$ 10 days)         | MS/B5+ Claforan 500 mg/L      |
|                                                                 | SH+ Claforan 500 mg/L         |
| Second phase media (hairy root proliferation $\geq$ 30-35 days) | 0.5MS+ Claforan 500 mg/L      |
|                                                                 | 0.5MS+IBA+ Claforan 500 mg/L  |
|                                                                 | 0.5 B5+ Claforan 500 mg/L     |
|                                                                 | 0.5 B5+IBA+ Claforan 500 mg/L |
|                                                                 | SH+ Claforan 500 mg/L         |
| Third phase medium (stable growth and maintainability)          | MS+ Claforan 250 mg/L         |
|                                                                 | 0.5MS+ Claforan 250 mg/L      |
|                                                                 | B5+ Claforan 250 mg/L         |
|                                                                 | 0.5 B5+ Claforan 250 mg/L     |
|                                                                 | SH+ Claforan 250 mg/L         |

After one month of culturing of hairy roots in third phase medium, claforan was removed from it.

**ESI table 2. Effect of medium on induction of hairy roots in *A. bracteosa***

| <b>Media</b> | <b>Strain</b> | <b>Explants</b> | <b>No. of roots</b> | <b>Explants producing roots</b> | <b>Root induction (days)</b> | <b>Branching (%)</b> |
|--------------|---------------|-----------------|---------------------|---------------------------------|------------------------------|----------------------|
| MS/B5        | LBA-9402      | 839             | 49                  | 34                              | 13                           | 40                   |
|              | A4            | 415             | 33                  | 23                              | 12                           | 55                   |
|              | Arqua1        | 262             | 12                  | 8                               | 9                            | 60                   |
| SH           | LBA-9402      | 60              | 289                 | 31                              | 7                            | 90                   |
|              | A4            | 20              | 78                  | 5                               | 8                            | 100                  |

**ESI table 3. Effect of medium on proliferation of hairy roots in *A. bracteosa***

| <b>Strain</b> | <b>Media</b> | <b>Growth status of roots</b>                                           |
|---------------|--------------|-------------------------------------------------------------------------|
| LBA-9402      | 0.5B5+IBA    | Secondary branches, increase in length, few produce callus              |
|               | 0.5B5        | Single root, no ramification, very slow growth                          |
|               | 0.5MS        | Single root, no ramification, very slow growth                          |
|               | 0.5MS+IBA    | More increase in length than width, ramification, some produce callus   |
|               | SH           | No ramification, callus induction                                       |
| A4            | 0.5B5+IBA    | Ramification, length increase, some generate callus by increasing width |
|               | 0.5B5        | No growth, no ramification                                              |
|               | 0.5MS        | No growth, no ramification                                              |
|               | 0.5MS+IBA    | Ramification, increased in width and swollen, length also increased     |
|               | SH           | Pale yellow, dying                                                      |
| ARqual        | 0.5B5+IBA    | Swollen callus, spiny                                                   |
|               | 0.5B5        | No growth, no ramification, greyish                                     |
|               | 0.5MS        | Dead                                                                    |
|               | 0.5MS+IBA    | Dying, no growth                                                        |
|               | SH           | Surviving                                                               |

**ESI table 4. Effect of medium on stable growth and maintainability of hairy roots in *A. bracteosa***

| <b>Media</b> | <b>Growth status of roots</b>                                               |
|--------------|-----------------------------------------------------------------------------|
| B5           | Bit swollen, broader, thick, ramification but less increase in length       |
| MS           | Callus like, beaded appearance, no increase in length but increase in width |
| 0.5B5        | Normal hairy roots, ramification, increase in length found, few are thick   |
| 0.5MS        | Multiple ramification, densely hairy, increase in length, few are thick     |
| SH           | No increase, pale yellow roots, dying                                       |

**ESI table 5. Effect of explants' origin on hairy root induction and its attributes in *A. bracteosa***

|                 | <b>Strain</b> | <b>Explants</b> | <b>No. of roots</b> | <b>Explants producing roots</b> | <b>Root induction (days)</b> | <b>Branching</b> |
|-----------------|---------------|-----------------|---------------------|---------------------------------|------------------------------|------------------|
| <i>In vitro</i> | LBA-9402      | 634             | 22                  | 15                              | 14                           | No               |
|                 | A4            | 245             | 12                  | 15                              | 13                           | No               |
|                 | Arqua1        | 204             | 9                   | 5                               | 8                            | No               |
| <i>Ex vitro</i> | LBA-9402      | 265             | 301                 | 41                              | 11                           | Yes              |
|                 | A4            | 190             | 99                  | 16                              | 12                           | Yes              |
|                 | Arqua1        | 58              | 3                   | 3                               | 11                           | Yes              |

**ESI table 6. PCR analysis of the T-DNA genes of pRi in transgenic hairy roots genome**

| Hairy Root | Morphology | <i>rolC</i> | <i>virD1</i> | <i>auxI</i> | <i>masI</i> | <i>ags</i> |
|------------|------------|-------------|--------------|-------------|-------------|------------|
| A1         | THR        | +           | -            | +           | +           | +          |
| A2         | CM         | +           | -            | +           | +           | +          |
| L1         | THR        | +           | -            | +           | +           | +          |
| L2         | THR        | +           | -            | +           | +           | +          |
| L3         | THR        | +           | -            | +           | +           | +          |
| L4         | TK         | +           | -            | +           | +           | +          |
| L5         | THR        | +           | -            | -           | +           | -          |
| L6         | CM         | +           | -            | +           | +           | +          |
| L7         | TK         | +           | -            | +           | +           | +          |
| L8         | THR        | +           | -            | +           | +           | +          |
| L9         | TK         | +           | -            | +           | +           | +          |
| L10        | THR        | +           | -            | +           | +           | +          |
| L11        | THR        | +           | -            | -           | +           | -          |
| L12        | THR        | +           | -            | -           | +           | +          |
| L13        | THR        | +           | -            | +           | +           | +          |
| L14        | TK         | +           | -            | +           | +           | +          |
| L15        | THR        | +           | -            | -           | +           | +          |
| L16        | TN         | +           | -            | -           | -           | -          |
| L17        | TN         | +           | -            | -           | +           | -          |
| L18        | THR        | +           | -            | +           | +           | +          |
| L19        | TK         | +           | -            | +           | +           | +          |
| L20        | THR        | +           | -            | +           | +           | +          |
| L21        | CM         | +           | -            | +           | +           | +          |
| L22        | TN         | +           | -            | -           | -           | -          |
| L23        | THR        | +           | -            | +           | +           | +          |
| L24        | TK         | +           | -            | +           | +           | +          |
| L25        | THR        | +           | -            | -           | +           | +          |
| L26        | THR        | +           | -            | +           | +           | -          |
| L27        | CM         | +           | -            | +           | +           | +          |
| L28        | TN         | +           | -            | -           | -           | -          |
| L29        | THR        | +           | -            | +           | +           | -          |
| L30        | THR        | +           | -            | -           | +           | -          |
| L31        | THR        | +           | -            | +           | +           | +          |
| L32        | THR        | +           | -            | +           | +           | +          |
| L33        | TK         | +           | -            | +           | +           | +          |
| L34        | THR        | +           | -            | +           | +           | +          |
| L35        | THR        | +           | -            | -           | +           | -          |
| L36        | CM         | +           | -            | +           | +           | +          |
| L37        | THR        | +           | -            | +           | +           | +          |
| L38        | THR        | +           | -            | -           | +           | +          |
| L39        | THR        | +           | -            | +           | +           | -          |
| L40        | CM         | +           | -            | +           | +           | +          |
| L41        | TN         | +           | -            | -           | -           | -          |
| L42        | CM         | +           | -            | -           | +           | +          |
| L43        | THR        | +           | -            | -           | +           | +          |
| L44        | THR        | +           | -            | -           | +           | -          |
| L45        | THR        | +           | -            | +           | +           | +          |
| L46        | THR        | +           | -            | +           | +           | +          |
| L47        | THR        | +           | -            | +           | +           | +          |
| L48        | TK         | +           | -            | +           | +           | +          |
| L49        | TN         | +           | -            | -           | -           | -          |
| L50        | CM         | +           | -            | +           | +           | +          |
| L51        | THR        | +           | -            | +           | +           | +          |
| L52        | CM         | +           | -            | +           | +           | +          |
| L53        | CM         | +           | -            | +           | +           | +          |
| L55        | THR        | +           | -            | +           | +           | +          |
| L56        | THR        | +           | -            | -           | +           | -          |
| Ar1        | +          | -           | +            | +           | +           | +          |

+: present, -: absent
